# Supplementary material for: Implications of Possible HBV-Driven Regulation of Gene Expression in Stem Cell-like Subpopulation of Huh-7 Hepatocellular Carcinoma Cell Line
Source: MDPI journal article supplement (doi:10.3390/jpm12122065), 2022-12-14
Supplement: s1 [file s1]

**Supplementary Table S2: HBV genotype dependent sequences of ‘Region 1’ and ‘Region 2’.**

| Hepatitis B<br>Virus<br>Genotype | Sequence of the viral genome regions where stemloop sequences of miRNAs are mostly aligned |                                                                       |
|----------------------------------|--------------------------------------------------------------------------------------------|-----------------------------------------------------------------------|
|                                  | Region 1                                                                                   | Region 2                                                              |
| <b>A</b>                         | GATCCTTCGCGGGACGTCCTTTGTTTACGTCCCGTCGGCGCTGAATCCCGC<br>GGACGACCCCTCTCGGGGCC                | TGTTTAAGGACTGGGAG_GAGCTGGGGGAGGAGATTAGGTTAAT<br>GATCTTTGTATTAGTAAATTG |
| <b>B</b>                         | GATCCTGCGCGGGACGTCCTTTGTCTACGTCCCGTCGGCGCTGAATCCCG<br>CGGACGACCCCTCCCGGGGCC                | TGTTTACTGAGTGGGAG_GAGTTGGGGGAGGAGATCAGGTAA<br>AGGTCTTTGTACTAGTAAATTG  |
| <b>C</b>                         | GATCCTGCGCGGGACGTCCTTTGTCTACGTCCCGTCGGCGCTGAATCCCG<br>CGGACGACCCGTCTCGGGGCC                | TGTTTAAGGACTGGGAG_GAGTTAGGGGAGGAGACTAGGTAA<br>TGATCTTTGTACTAGTAAATTG  |
| <b>D</b>                         | GATCCTGCGCGGGACGTCCTTTGTTTACGTCCCGTCGGCGCTGAATCCCGC<br>GGACGACCCCTCTCGGGGCC                | TGTTTAAGGACTGGGAG_GAGTTGGGGGAGGAGACTAGATTAAT<br>GATCTTTGTACTAGTAAATTG |
| <b>E</b>                         | GATCCTGCGAGGGACGTCCTTTGTCTACGTCCCGTCAGCGCTGAATCCTG<br>CGGACGATCCGTCTCGGGGTC                | TGTTTAAAGACTGGGAG_GAGTTGGGGGAGGAGATTAGATTAA<br>AGATCTTTGTACTAGTAAATTG |
| <b>F</b>                         | GATCCTGCGCGGGACGTCCTTTGTTTACGTCCCGTCGGCGCTGAATCCCGC<br>GGACGACCCCTCCCGGGGTC                | TATTTAAGGACTGGGAG_GAGCTGGGGGAGGAGATCAGGTAA<br>AGGTCTTTGTACTAGTAAATTG  |
| <b>G</b>                         | GATCCTTCGCGGGACGTCCTTTGTTTACGTCCCGTCAGCGCTGAATCCAGC<br>GGACGACCCCTCCCGGGGCC                | TTTTTGCTGAGTGGGAA_GAATTAGGCAATGAGTCCAGGTAA<br>GACCTTTGTATTAGTAAATTG   |
| <b>H</b>                         | GATCCTGCGCGGGACGTCCTTTGTCTACGTCCCGTCGGCGCTGAATCCTGC<br>GGACGACCCCTCTCGTGGTC                | TATTTAAGGACTGGGAG_GAGTCGGGGGAGGAGTTGAGGTAA<br>AGGTCTTTGTACTAGTAAATTG  |
