# Supplementary material for: Implications of Possible HBV-Driven Regulation of Gene Expression in Stem Cell-like Subpopulation of Huh-7 Hepatocellular Carcinoma Cell Line
Source: MDPI journal article supplement (doi:10.3390/jpm12122065), 2022-12-14
Supplement: s1 [file s1]

**Supplementary Table S1: The list of miRNAs of which their expressions were significantly changed upon STIM1 and/or Orai1 enhancement to mimic poor cancer prognosis in Hepatocellular carcinoma (HCC). OE: Overexpression.**

**Comparison 1: Stim1 OE Cancer Stem Cell (CSC) compared to Control (plasmid only) Cancer Stem Cell (CSC)**

| miRNA                 | Taget Mean  | Target Std. Dev. | Control Mean | Control Std. Dev. | P value     | Fold change              |
|-----------------------|-------------|------------------|--------------|-------------------|-------------|--------------------------|
| mir-3653_(Mature_3')  | 6.595154638 | 0.565466249      | 3.676764085  | 1.792694967       | 0.041692138 | 2.918390554              |
| mir-3651_(Mature_3')  | 8.539157515 | 0.193430013      | 6.309877124  | 0.853272639       | 0.011473394 | 2.229280391              |
| mir-5001_(Mature_5')  | 5.424543803 | 0.440915119      | 3.402232559  | 0.826013482       | 0.009223383 | 2.022311244              |
| mir-6715a_(Mature_3') | 6.474286217 | 0.519160512      | 4.66282746   | 0.949428813       | 0.022777997 | 1.811458758              |
| mir-3607_(Mature_3')  | 10.43273726 | 0.26829328       | 8.653426108  | 0.825240993       | 0.018084146 | 1.779311156              |
| mir-576_(Mature_3')   | 5.483775513 | 0.8994546        | 7.222120385  | 0.3759195         | 0.023285576 | <sup>-</sup> 1.738344873 |
| mir-101-1_(Mature_5') | 3.432632377 | 0.639184996      | 5.229857428  | 0.153554407       | 0.008993495 | <sup>-</sup> 1.797225052 |

**Comparison 2: Orai1 OE Cancer Stem Cell (CSC) compared to Control (plasmid only) Cancer Stem Cell (CSC)**

| miRNA                 | Taget Mean  | Target Std. Dev. | Control Mean | Control Std. Dev. | P value     | Fold change |
|-----------------------|-------------|------------------|--------------|-------------------|-------------|-------------|
| mir-3653_(Mature_3')  | 6.569538865 | 1.297740862      | 3.676764085  | 1.792694967       | 0.043534257 | 2.892774781 |
| mir-5001_(Mature_5')  | 5.334951092 | 0.641612557      | 3.402232559  | 0.826013482       | 0.011280003 | 1.932718533 |
| mir-1538_(Mature_3')  | 6.512744271 | 0.797275217      | 4.779650704  | 0.563818          | 0.014406629 | 1.733093567 |
| mir-6798_(Mature_3')  | 6.753374818 | 0.468498981      | 5.084659615  | 0.193220785       | 0.00277273  | 1.668715203 |
| mir-8485_(Mature_3')  | 7.435736449 | 0.552563101      | 5.793276294  | 0.23640102        | 0.005209497 | 1.642460155 |
| mir-197_(Mature_5')   | 7.864427359 | 0.485503679      | 6.264176248  | 0.209466464       | 0.003527529 | 1.600251111 |
| mir-6715a_(Mature_3') | 6.261465064 | 0.735855607      | 4.66282746   | 0.949428813       | 0.039693683 | 1.598637604 |

|                                            |             |             |             |             |             |              |
|--------------------------------------------|-------------|-------------|-------------|-------------|-------------|--------------|
| <b>mir-4479_(Mature_3')</b>                | 4.986406538 | 0.889461272 | 3.423393283 | 0.721377666 | 0.035686821 | 1.563013255  |
| <b>mir-4512_(Mature_3')</b>                | 6.663321218 | 0.203372369 | 5.135294838 | 0.283432362 | 0.000207446 | 1.52802638   |
| <b>mir-548at_(Mature_5')</b>               | 3.350986325 | 0.665914135 | 4.869249079 | 0.676766358 | 0.018649172 | -1.518262754 |
| <b>mir-548b_(Mature_5')</b>                | 5.945021252 | 0.505601042 | 7.527855889 | 0.459495246 | 0.003648395 | -1.582834637 |
| <b>mir-548d-1// mir-548d-2_(Mature_5')</b> | 3.586872274 | 1.011594701 | 5.173795881 | 0.4118418   | 0.044288945 | -1.586923607 |
| <b>mir-451a_(Mature_5')</b>                | 4.78893661  | 0.482888588 | 6.486764737 | 0.412088144 | 0.00188577  | -1.697828126 |
| <b>mir-26a-1_(Mature_3')</b>               | 5.616966521 | 0.462203057 | 7.762631138 | 0.311636756 | 0.000468479 | -2.145664617 |

**Comparison 3: EpCAM & CD133 Positive Cancer Stem Cell (CSC) compared to EpCAM & CD133 negative Non-cancer Stem Cells (NCSC)**

| <b>miRNA</b>                  | <b>Taget Mean</b> | <b>Target Std. Dev.</b> | <b>Control Mean</b> | <b>Control Std. Dev.</b> | <b>P value</b> | <b>Fold change</b> |
|-------------------------------|-------------------|-------------------------|---------------------|--------------------------|----------------|--------------------|
| <b>mir-552_(Mature_3')</b>    | 9.10144           | 0.44581                 | 7.25759             | 0.21636                  | 0.00126        | 1.84385            |
| <b>mir-6735_(Mature_5')</b>   | 4.50756           | 0.81081                 | 2.75537             | 0.75831                  | 0.01977        | 1.75219            |
| <b>mir-552_(Mature_5')</b>    | 7.05840           | 0.44170                 | 5.39928             | 0.33686                  | 0.00126        | 1.65912            |
| <b>mir-3194_(Mature_5')</b>   | 6.26785           | 0.81847                 | 4.70208             | 0.57609                  | 0.02351        | 1.56577            |
| <b>mir-4461_(Mature_3')</b>   | 2.73261           | 0.44740                 | 4.23348             | 0.55608                  | 0.00624        | -1.50087           |
| <b>mir-3150a_(Mature_5')</b>  | 3.85441           | 0.92168                 | 5.44836             | 0.29278                  | 0.03511        | -1.59394           |
| <b>mir-365a_(Mature_5')</b>   | 4.92110           | 0.38865                 | 6.56542             | 0.77851                  | 0.01628        | -1.64432           |
| <b>mir-125b-1_(Mature_3')</b> | 7.34214           | 0.25193                 | 9.19897             | 0.34637                  | 0.00021        | -1.85683           |
| <b>mir-181d_(Mature_5')</b>   | 6.54752           | 0.26773                 | 8.45216             | 0.16055                  | 0.00007        | -1.90463           |
| <b>mir-3591_(Mature_3')</b>   | 7.14796           | 0.48494                 | 9.05504             | 0.19899                  | 0.00193        | -1.90708           |
| <b>mir-181c_(Mature_5')</b>   | 6.29427           | 0.30647                 | 8.47269             | 0.19584                  | 0.00006        | -2.17842           |

|                      |         |         |         |         |         |          |
|----------------------|---------|---------|---------|---------|---------|----------|
| mir-1261_(Mature_5') | 4.13906 | 0.85072 | 6.53759 | 0.06144 | 0.01081 | -2.39853 |
|----------------------|---------|---------|---------|---------|---------|----------|
