# Supplementary material for: Implications of Possible HBV-Driven Regulation of Gene Expression in Stem Cell-like Subpopulation of Huh-7 Hepatocellular Carcinoma Cell Line
Source: MDPI journal article supplement (doi:10.3390/jpm12122065), 2022-12-14
Supplement: s1 [file s1]

**Supplementary Table S3** BLAT results of HBV Region 2 against human genome. HBV Region 2 of different genotypes has been found to be integrated in different intronic regions of different genes within human genome.

|                                  | Viral Sequence Putative "Region 2" |                   |                 |                                    | Human Chromosomal Region Information |        |                   |                 |                                                         |                                                                                        |
|----------------------------------|------------------------------------|-------------------|-----------------|------------------------------------|--------------------------------------|--------|-------------------|-----------------|---------------------------------------------------------|----------------------------------------------------------------------------------------|
| Hepatitis<br>B Virus<br>Genotype | BLAT<br>Score                      | Start<br>Position | End<br>Position | Sequence<br>Identity<br>Percentage | Chromosome<br>number                 | Strand | Start<br>position | End<br>Position | Genes within the<br>corresponding<br>chromosomal region | Location within the gene<br>where the viral genomic<br>region found                    |
| <b>A</b>                         | 22                                 | 8                 | 30              | 100%                               | 16                                   | -      | 66992169          | 66992192        | <i>CES4A</i>                                            | Intron (1/11)                                                                          |
|                                  | 21                                 | 11                | 33              | 95.7%                              | 1                                    | -      | 46522501          | 46522523        | Alternate haplotype<br>sequence                         |                                                                                        |
|                                  | 20                                 | 13                | 32              | 100%                               | 8                                    | -      | 127426802         | 127426821       | <i>CASC8</i>                                            | Intron (4/5)                                                                           |
| <b>B</b>                         | 23                                 | 7                 | 30              | 100%                               | 2                                    | -      | 30732664          | 30732688        | <i>CAPN13</i>                                           | Intron (19/22)                                                                         |
|                                  | 21                                 | 9                 | 31              | 95.7%                              | 18                                   | -      | 5564745           | 5564767         | <i>EPB41L3</i>                                          | Intron (3/21)                                                                          |
|                                  | 20                                 | 15                | 34              | 100%                               | 20                                   | -      | 38727067          | 38727086        | <i>SLC32A1</i>                                          | Intron (1/1)                                                                           |
|                                  | 20                                 | 11                | 30              | 100%                               | 18                                   | -      | 12668263          | 12668282        | <i>PSMG2</i><br><i>CEP76</i>                            | Intron (1/6)<br>Intron (12/12)                                                         |
|                                  | 23                                 | 13                | 38              | 96%                                | 2                                    | +      | 240731950         | 240731976       | <i>KIF1A</i><br><i>Alt haplotypes</i>                   | Intron (36/46)<br>Intron (38/48)<br>Intron (36/47)<br>Intron (37/47)<br>Intron (38/49) |
|                                  | 20                                 | 13                | 32              | 100%                               | 1                                    | -      | 18575914          | 18575933        | Alternate haplotype<br>sequence                         |                                                                                        |
|                                  | 20                                 | 11                | 32              | 95.5%                              | 3_KI270937v1_alt                     | +      | 81170             | 81191           | <i>MUC20-OT1</i>                                        | Intron (2/4)<br>Intron (2/3)                                                           |

|          |    |    |    |       |                  |   |           |           |                                       |                                                             |
|----------|----|----|----|-------|------------------|---|-----------|-----------|---------------------------------------|-------------------------------------------------------------|
| <b>C</b> |    |    |    |       |                  |   |           |           |                                       | Intron(1/2)<br>Intron (3/4)                                 |
|          | 20 | 11 | 32 | 95.5% | 3_KI270936v1_alt | + | 80903     | 80924     | <i>MUC20-OT1</i>                      | Intron (2/4)<br>Intron (2/3)<br>Intron(1/2)<br>Intron (3/4) |
|          | 20 | 11 | 32 | 95.5% | 3_KI270934v1_alt | + | 80596     | 80617     | <i>MUC20-OT1</i>                      | Intron (2/4)<br>Intron (2/3)<br>Intron(1/2)<br>Intron (3/4) |
| <b>D</b> | 21 | 7  | 27 | 100%  | 17               | - | 38850927  | 38850947  | <i>RPL23</i><br><i>Alt haplotypes</i> | Intron (3/4)<br>Intron (3/5)<br>Intron (3/3)                |
|          | 21 | 15 | 35 | 100%  | 12               | + | 2737703   | 2737723   | Alternate haplotype<br>sequence       |                                                             |
|          | 20 | 16 | 35 | 100%  | 12               | + | 505803    | 505822    | <i>B4GALNT3</i>                       | Intron (1/19)                                               |
| <b>E</b> | 23 | 25 | 48 | 100%  | 3_KI270778v1_alt | - | 233459    | 233497    | Alternate haplotype<br>sequence       |                                                             |
|          | 20 | 15 | 34 | 100%  | 20               | - | 38727067  | 38727086  | <i>SLC32A1</i>                        | Intron (1/1)                                                |
| <b>F</b> | 22 | 8  | 30 | 100%  | 1                | - | 66992169  | 66992192  | <i>CES4A</i>                          | Intron (1/11)                                               |
|          | 21 | 11 | 33 | 95.7% | 1                | - | 46522501  | 46522523  | Alternate haplotype<br>sequence       |                                                             |
|          | 20 | 13 | 32 | 100%  | 8                | - | 127426802 | 127426821 | <i>CASC8</i>                          | Intron (4/5)                                                |
