# Supplementary material for: Implications of Possible HBV-Driven Regulation of Gene Expression in Stem Cell-like Subpopulation of Huh-7 Hepatocellular Carcinoma Cell Line
Source: MDPI journal article supplement (doi:10.3390/jpm12122065), 2022-12-14
Supplement: s1 [file s1]

**Table S5.** The list of GEO Datasets of Hepatocellular Carcinoma Cell Lines analyzed for Mpp7 and  $\beta$ -LTBP expressions at the RNA level.

| <b>GEO Accession Number</b>  | <b>Probe ID for Mpp7</b> | <b>Probe ID for <math>\beta</math>-LTBP (LTBP 2)</b> |
|------------------------------|--------------------------|------------------------------------------------------|
| GSE112788                    | 1564308_a_at             | 202728_s_at                                          |
| GSE79232 (GPL16700 Platform) | MPP7                     | No data                                              |
| GSE97172 (GPL6244 Platform)  | 7932765                  | 7980152                                              |
| GSE85274 (GPL13667 Platform) | 11734214_a_at            | 11720527_at                                          |
| GSE36139 (GPL15308 Platform) | 143098_at                | 4053_at                                              |
