# Supplementary material for: Implications of Possible HBV-Driven Regulation of Gene Expression in Stem Cell-like Subpopulation of Huh-7 Hepatocellular Carcinoma Cell Line
Source: MDPI journal article supplement (doi:10.3390/jpm12122065), 2022-12-14
Supplement: s1 [file s1]

**Supplementary Table S4** Oligonucleotide sequences of RT PCR primers used to investigate EMT and MET properties of STIM1- and/or Orai1-enhanced Huh-7 HCC CSCs.

| Gene              | Primer sequence (5'-3') |                                 | Amplicon size (bp) |
|-------------------|-------------------------|---------------------------------|--------------------|
| <b>E-Cadherin</b> | F                       | TAC ACT GCC CAG GAG CCA GA      | 103                |
|                   | R                       | TGG CAC CAG TGT CCG GAT TA      |                    |
| <b>N-Cadherin</b> | F                       | ATT GGA CCA TCA CTC GGC TTA     | 159                |
|                   | R                       | CAC ACT GGC AAA CCT TCA CG      |                    |
| <b>Vimentin</b>   | F                       | CCT TGA CAT TGA GAT TGC CAC CTA | 215                |
|                   | R                       | TCA TCG TGA TGC TGA GAA GTT TCG |                    |
| <b>18S rRNA</b>   | F                       | CGA CGA CCC ATT CGA ACG TCT     | 312                |
|                   | R                       | GCT ATT GGA GCT GGA ATT ACC G   |                    |
